# Supplementary material for: Associations between Adverse Childhood Experiences and Obesity in a Developing Country: A Cross-Sectional Study among Middle-Aged and Older Chinese Adults
Source: MDPI journal article supplement (doi:10.3390/ijerph19116796), 2022-06-02
Supplement: s1 [file s1]

**Supplementary Table S1. Questionnaire items and definitions of each ACE indicator.**

| ACEs Indicators                       | Questionnaire Items                                                                                                                                                                                                |
|---------------------------------------|--------------------------------------------------------------------------------------------------------------------------------------------------------------------------------------------------------------------|
| <b>Physical abuse</b>                 | When you were growing up, did your female/male guardian ever hit you? (often <sup>a</sup> , sometimes <sup>a</sup> , rarely, or never)                                                                             |
| <b>Emotional neglect</b>              | How much love and affection did your female guardian give you while you were growing up? (often, sometimes, rarely <sup>a</sup> , or never <sup>a</sup> )                                                          |
|                                       | How much effort did your female guardian put into watching over you? (a lot, some, a little <sup>a</sup> , or not at all <sup>a</sup> )                                                                            |
| <b>Household substance abuse</b>      | During the years you were growing up, did your female/male guardian ever have alcoholism or drug? (yes <sup>a</sup> or no)                                                                                         |
| <b>Household mental illness</b>       | Did your female/male guardian have abnormality of mind when you were young? (yes <sup>a</sup> or no)                                                                                                               |
|                                       | During the years you were growing up, had your female/male guardian often showed continued signs of sadness or depression? (during all <sup>a</sup> , most <sup>a</sup> , some, or only a little of the childhood) |
| <b>Domestic violence</b>              | Have your father/mother ever beat up your mother/father? (often <sup>a</sup> , sometimes <sup>a</sup> , not very often, or never)                                                                                  |
| <b>Incarcerated household member</b>  | During the years you were growing up, have your female/male guardian ever been arrested or sent to prison? (yes <sup>a</sup> or no)                                                                                |
| <b>Parental separation or divorce</b> | Were your biological parents divorced (including long separation due to emotional problems) before you were 17 years? (yes <sup>a</sup> or no)                                                                     |
| <b>Unsafe neighborhood</b>            | Was it safe being out alone at night in the neighborhood where you lived as a child? (very safe, somewhat safe, not very safe <sup>a</sup> , or not safe at all <sup>a</sup> )                                     |
| <b>Bullying</b>                       | When you were a child, how often were you picked on or bullied by kids in your neighborhood? (often <sup>a</sup> , sometimes <sup>a</sup> , not very often, or never)                                              |
|                                       | When you were a child, how often were you picked on or bullied by kids in your school? (often <sup>a</sup> , sometimes <sup>a</sup> , not very often, or never)                                                    |
| <b>Parental death<sup>b</sup></b>     | Either of the parents was dead before participant was 17 years. (yes <sup>a</sup> or no)                                                                                                                           |
| <b>Sibling death<sup>c</sup></b>      | Any of the siblings was dead before participant was 17 years. (yes <sup>a</sup> or no)                                                                                                                             |
| <b>Parental disability</b>            | Did your female/male guardian have a long time being sick on bed when you were young? (yes <sup>a</sup> or no)                                                                                                     |
|                                       | Did your female/male guardian have a serious deformity when you were young? (yes <sup>a</sup> or no)                                                                                                               |

Abbreviation: ACEs: Adverse Childhood Experiences.

<sup>a</sup> Answers indicate thresholds for ACEs.

<sup>b</sup> Calculated based on dates of birth and their parental death

<sup>c</sup> Calculated based on dates of birth and their sibling death
